# Supplementary material for: Analysis of Genetic Diversity and Construction of a Core Collection of Ginkgo biloba Germplasm Using EST-SSR Markers
Source: MDPI journal article supplement (doi:10.3390/f14112155), 2023-10-30
Supplement: s1 [file s1]

**Table S1.** Sample information of germplasm resources in Ginkgo.

| Code | Germplasm name      | Geographical origin | Code | Germplasm name       | Geographical origin |
|------|---------------------|---------------------|------|----------------------|---------------------|
| 1    | Guilin 2            | Guangxi             | 52   | Jiangsudafoshou      | Jiangsu             |
| 2    | Guilin 6            | Guangxi             | 53   | Caolou 1             | Jiangsu             |
| 3    | Guilin 8            | Guangxi             | 54   | Caolou 2             | Jiangsu             |
| 4    | Guilin 9            | Guangxi             | 55   | Yancheng 1           | Jiangsu             |
| 5    | Haiyanghuang        | Guangxi             | 56   | Dongtingfoshou       | Jiangsu             |
| 6    | Daozhen 5           | Guizhou             | 57   | Dongtinghuang        | Jiangsu             |
| 7    | Daozhen 7           | Guizhou             | 58   | Sunongfoshou         | Jiangsu             |
| 8    | Changbaiguo         | Guizhou             | 59   | Dongbeidagushanshang | Liaoning            |
| 9    | Dalongyan           | Guizhou             | 60   | Dongbeidagushanxia   | Liaoning            |
| 10   | Zhengan 1           | Guizhou             | 61   | Dongbeidazhaizi      | Liaoning            |
| 11   | Zhengan 2           | Guizhou             | 62   | Taian 013            | Shandong            |
| 12   | Zhengan 3           | Guizhou             | 63   | Taian 025            | Shandong            |
| 13   | Zhengan 4           | Guizhou             | 64   | Taian 1              | Shandong            |
| 14   | Anlu 1-4            | Hubei               | 65   | Taian 65             | Shandong            |
| 15   | Anlu 1-5            | Hubei               | 66   | Chuizhiyinxing       | Shandong            |
| 16   | Anlu 1-6            | Hubei               | 67   | Songyeyinxing        | Shandong            |
| 17   | Pengrisan 1-6       | Hubei               | 68   | Xiajinyinxing        | Shandong            |
| 18   | Nanlinguo 4         | Jiangsu             | 69   | Yuanling 13          | Shandong            |
| 19   | Nanlinwai 1         | Jiangsu             | 70   | Yuanling 9           | Shandong            |
| 20   | Nanlinwai 4         | Jiangsu             | 71   | Changnuobaiguo       | Shandong            |
| 21   | Pixianxueji         | Jiangsu             | 72   | Taian 77             | Shandong            |
| 22   | Caiyeyinxing        | Jiangsu             | 73   | Damaling             | Shandong            |
| 23   | Huangyeyinxing      | Jiangsu             | 74   | Tancheng 202         | Shandong            |
| 24   | Jinyeyinxing        | Jiangsu             | 75   | Tancheng 231         | Shandong            |
| 25   | Jinzhui 5           | Jiangsu             | 76   | Maling 1             | Shandong            |
| 26   | Pixianjindingfoshou | Jiangsu             | 77   | Maling 2             | Shandong            |
| 27   | Pixianmeihe         | Jiangsu             | 78   | Xincun 18            | Shandong            |
| 28   | Tiefu 1             | Jiangsu             | 79   | Xincun 9             | Shandong            |
| 29   | Tiefu 3             | Jiangsu             | 80   | Tancheng 207         | Shandong            |
| 30   | Tiema 1             | Jiangsu             | 81   | Yeziyinxing          | Shandong            |
| 31   | Tiema 2             | Jiangsu             | 82   | Gangxi 1             | Shaanxi             |
| 32   | Tiema 3             | Jiangsu             | 83   | Gangxi 2             | Shaanxi             |
| 33   | Tiema 4             | Jiangsu             | 84   | Yanan 1              | Shaanxi             |
| 34   | Zhouzhuang 6        | Jiangsu             | 85   | Changing 1           | Zhejiang            |
| 35   | Rugao               | Jiangsu             | 86   | Changing 2           | Zhejiang            |
| 36   | Gensi 3             | Jiangsu             | 87   | Changing 3           | Zhejiang            |
| 37   | Taixing 00590       | Jiangsu             | 88   | Changing 4           | Zhejiang            |
| 38   | Taixing 1           | Jiangsu             | 89   | Zhongnanlin 1        | Hunan               |
| 39   | Taixing 2           | Jiangsu             | 90   | Zhongnanlin 2        | Hunan               |
| 40   | Gensi 1             | Jiangsu             | 91   | Zhongnanlin 3        | Hunan               |
| 41   | Gensi 2             | Jiangsu             | 92   | Zhongnanlin 4        | Hunan               |

---

|    |                    |         |     |             |       |
|----|--------------------|---------|-----|-------------|-------|
| 42 | Taixing 4          | Jiangsu | 93  | Shao 1-10   | Hunan |
| 43 | Taixing 00756      | Jiangsu | 94  | Shao 1-13   | Hunan |
| 44 | Taixing 00343      | Jiangsu | 95  | Shao 2-2    | Hunan |
| 45 | Gaogangqu 1        | Jiangsu | 96  | Shao 2-9    | Hunan |
| 46 | Gaogangqu 2        | Jiangsu | 97  | Xin x1      | Hunan |
| 47 | Wuxijiandingfoshou | Jiangsu | 98  | Xinning 25  | Hunan |
| 48 | Huayeyinxing       | Jiangsu | 99  | Dongan 10   | Hunan |
| 49 | Dafozhi            | Jiangsu | 100 | Tengjiulang | Japan |
| 50 | Xiaoyuanzi         | Jiangsu | 101 | Jiushou     | Japan |
| 51 | Yapigu             | Jiangsu |     |             |       |

---

**Table S2.** Primer sequence and product sizes of 100 SSR markers for analyzing genetic diversity.

| Locus code | Primer sequences       |                        | Standard length (bp) |
|------------|------------------------|------------------------|----------------------|
|            | FORWARD PRIMER1(5'-3') | REVERSE PRIMER1(5'-3') |                      |
| GbSSR10214 | TTTGGGAGTAGTGTGTTGT    | CTGGATTGCATTGAAGTC     | 340                  |
| GbSSR01538 | AGAGATTTTGCGACAGAGC    | GGTAGCAGTTGAACCGTTA    | 102                  |
| GbSSR00112 | AGGGAAAAAGTGAAAGAGAGAG | CTAGTCAAGGCGAGGTTAAAGA | 239                  |
| GbSSR00100 | CCATGCACAAAACCTTGCTGT  | GTCACCTGGGGCAAAGAAAA   | 274                  |
| GbSSR00149 | AATTGTTGCCTTGGGAAATG   | CACAACCGTAGATCTTAGTGCC | 268                  |
| GbSSR00438 | GTCTGGGGGAAGCTCTTTCT   | GGCCATTGAATTTGAACCTG   | 239                  |
| GbSSR02181 | CAGACACATGAACCCCTTCC   | ATGCCCTGGCATATTTTGAT   | 220                  |
| GbSSR04447 | CCGAGAGAAAGATACAGCCG   | CCACAACCCAAAAAGCCTTA   | 212                  |
| GbSSR05243 | CAGATTGTCATGCACCCCTA   | TCCTTGGTAAACGCCATTCTC  | 234                  |
| GbSSR05835 | GGTTGGATCGAATTTGCCTA   | AGGAATCAGCATCGTGAACA   | 266                  |
| GbSSR05999 | GTAGGCCTCTCCTCCAATCC   | AATGGACCACATTGGGTGTT   | 273                  |
| GbSSR09511 | CAACAGTGGGGGTATCCAGT   | CCTTAAGCCTGCAAGTCTGG   | 253                  |
| GbSSR09902 | GAGCAGGTTGAGAGGGTTTTT  | TCCCAAGGTTTCCTTTTGTG   | 117                  |
| GbSSR10422 | ATCACGATTTCTTCGTTGGG   | GCTTGAATGTCCTCTGCCTC   | 253                  |
| GbSSR10692 | ATGAGTTTGTGGGTTGGGA    | CAGCCCAAATTAGACCCGTA   | 196                  |
| GbSSR11377 | CGGTATGTGTTGCAGTTTGG   | AACCAACGATGAACCTCCTG   | 277                  |
| GbSSR13689 | AATTTGGATGTCGCCATTGT   | AAGCCCTGATATGACCATGC   | 243                  |
| GbSSR16030 | AAGCGTCTCGAGAAAGTGGA   | TACGATGCAGGAAAACATGC   | 269                  |
| GbSSR17437 | TCAACGAGTGAGCCAATCTG   | CCTTCACCCTCTTCATTCTTG  | 258                  |
| GbSSR17611 | GGATTGATGGTCAGTGGGAC   | TGATGATTGGGAAAGAAGGG   | 223                  |
| GbSSR20941 | AAAGCAGAATTGGTAGCGGA   | TTGGGTGGAGGTAGTTGGAG   | 217                  |
| GbSSR21240 | AGGAGAACAGAGGCTGTGGA   | TTTGTATTTCCGTGGGAGC    | 185                  |
| GbSSR21429 | ACCAATGGCTGTTGATGTGA   | GCAAAAACAACATCCAGGCT   | 172                  |
| GbSSR22445 | TGCATTCAAAGCTCACTTGG   | GGACACAATACAAATGGGCA   | 278                  |
| GbSSR24218 | ACAAAACCTCCATTGCGATCC  | TGCAAACTTCCTGGATGAGA   | 238                  |
| GbSSR24634 | AAAACCCAAAAACCCAAACC   | TGCCATCTGCAGTTCTTTTG   | 209                  |
| GbSSR24669 | TTTTCACGGGGTTCTTCAC    | CTTCTCCTCGCTTGCTCACT   | 252                  |
| GbSSR25270 | ATGGTTCGGATGGATTATGC   | CCAATGCACCCAAGTTTCTT   | 260                  |
| GbSSR25769 | CACCCCTGGGATTATTGATG   | ATGAGTGGAATGTGGGCTTC   | 203                  |
| GbSSR27072 | CAAGCAAATTAGTGCTGCCA   | TGAATGCCTGATGATTGGA    | 218                  |
| GbSSR27370 | TGAAACATAGGGATGCAGGA   | ATGAAGGGAGAACCTTGCCT   | 240                  |
| GbSSR27391 | TGGGACATGACATGAGAAAAA  | GAGCATCCGTTAACCTTCCA   | 266                  |
| GbSSR27845 | ATGGGCGTCGTGGATAGTAG   | TTTTCCCAGATAGGCATTGG   | 229                  |
| GbSSR27860 | AGGTGGATGGGCATATTCAG   | CACAGTTGGCAGACGAAAAA   | 185                  |
| GbSSR28529 | AAAGGGGGAAGTGAAGATCG   | CCATGCAAGCATGAAATGAA   | 231                  |
| GbSSR29168 | CCATGTCTCCAAGGTCGATT   | CTTGCGAATACTGCATTGA    | 280                  |
| GbSSR30393 | AAGCCAGTGGTTTCTGATGC   | CACCACTAGGATCGGCATTT   | 227                  |
| GbSSR30511 | CATGGCATATGGTTTCAACG   | CCCAATTCAGGTACCCAAGA   | 169                  |
| GbSSR31083 | AAGTGGAGTTGTGAAACGGG   | TTTAGGCTGGAATGGATTGG   | 270                  |
| GbSSR31233 | ACTGGATGGGGTGATATTGG   | CGAACGGTTTCTCCTCATTC   | 256                  |
| GbSSR31776 | AGTGCATTTCAATTGCTTCG   | TTTCAGTCTCTGCGGGAGAT   | 266                  |

|            |                         |                                 |     |
|------------|-------------------------|---------------------------------|-----|
| GbSSR32242 | AATAACTGTGTGCGGGT       | AATCTGGCCGAATAAAATG             | 249 |
| GbSSR32986 | TGTTAATGAGCGTGACGAGC    | ATCCAAGTCGAACCAAAAC             | 170 |
| GbSSR34207 | GGACGTACAGCCCTGGTAAA    | AGCAGCACACACTGTCTGGA            | 175 |
| GbSSR34776 | AGAACGGTGCCAACAATAGG    | TCCCTGATTGCCAAAGTAGG            | 260 |
| GbSSR35712 | TTGTACCGTTCGGACATTGA    | TCTTCATCTTCCCAAGGCT             | 273 |
| GbSSR35940 | AAATAAATTGTCCAATCATGCAA | TGATGGGGGTGAAAGAAAAG            | 208 |
| GbSSR38701 | CTTTTGGGACTATGCGTC      | AAGGCCTTTTCCACTTCCAT            | 272 |
| GbSSR38936 | TGGTTCAAGCTGCAAATCAG    | GCACTGTGCCCAGAAGTACA            | 261 |
| GbSSR39204 | TTTTTGATTTTGTCTCTTTG    | TGGTAATTATTTGCCATGGGT           | 159 |
| GbSSR41178 | ACTCTCTCTTGAGCACCCA     | GACTTAAGGCCAACACCCAA            | 257 |
| GbSSRN2455 | GCTGCAGCCCTAATTTGTCT    | CAGCCATAGCACCTCACAA             | 278 |
| GbSSR00107 | CGCAAGTCTGCACCATAAAG    | TGTGTGCACAAGCACATCTC            | 232 |
| GbSSR00122 | GGAGGCTTCCATCGTAATCA    | ACCAGGCCAAAACATGGACTC           | 217 |
| GbSSR00123 | CATTCTTGCTTGCTTACCTGC   | CAGGTATGATGGCGTTACCC            | 274 |
| GbSSR00159 | TTGCCATAATGGAGTCCACA    | TTGGGTTGAGGTTCTGGTTC            | 223 |
| GbSSR00171 | TCTCCTTGCATGTAAGTTGC    | ATAAGAAGTGGGGCTGGGT             | 265 |
| GbSSR00176 | TGGTTACGACAATTGAATGGG   | GGTTCGGTTGTTACGTTTGC            | 280 |
| GbSSR00202 | AATCCTCCAACACCAAGCAG    | TGCTCAACTAATACAAAATATGA<br>GACA | 205 |
| GbSSR00892 | CCCCTGAGCCTAATCAACAA    | CAAGGGCCAGTTGGATTTA             | 229 |
| GbSSR01154 | CTTTCCATGGCCTTGATGTT    | GAAGCCATTGAAGCTCAACC            | 228 |
| GbSSR01567 | TTTCTTGTGCCAAGTTGCTG    | GCTTTAGCACTGGAGATGGC            | 236 |
| GbSSR01896 | TTTCAACATTCTCCGCTCCT    | TGACTTCAATTCCTTGCGTG            | 246 |
| GbSSR01983 | TGGTCCTTAATTGTCCTGAAGA  | GAAATTATTTGCCACAAGTTGC          | 271 |
| GbSSR03286 | TCCTCTTCTCTTTTCCGC      | AGTCGACTATGGCAAATGGG            | 244 |
| GbSSR04217 | CTCGGCACTGAAATCACAGA    | TATTGAAATTGGCTCCCTGG            | 195 |
| GbSSR04218 | TTGGCATCAGTGAAATTGGA    | CGCTGCTGATGTTGTAGGAA            | 146 |
| GbSSR04550 | GTCTGGCCAACAATGGAGTT    | CAATCATGGAAATGCAGACG            | 212 |
| GbSSR05104 | TGGTTTTTAGTGCTCCCCAC    | CTAAGCTCAAGCACCCCAAG            | 197 |
| GbSSR05580 | TTGGAACAAGAATATGAGCA    | TGAGCCTCTGCTTGCACTAA            | 272 |
| GbSSR05621 | GTGGTGCTGTTGCTGTGTTT    | ACCTCCATACACTTGCTGGG            | 160 |
| GbSSR06338 | GGTCTTCCTTCTTCTCGCCT    | GGCGCTAGAATCGAACTCAC            | 279 |
| GbSSR06466 | TTAGTAGCGAATCCCACGCT    | CCGTTGATCCTTCATGGTCT            | 250 |
| GbSSR06914 | TGCCAAGTTCATGGACGATA    | ATACCTCTCAAAGGCGCTCA            | 262 |
| GbSSR07094 | CTTCCGAAGTGCATCCTCTC    | GTTGAACAATTTGGGTTGCC            | 269 |
| GbSSR07545 | TTATCACTTGACGAGTGCG     | GAGGCTTTGAGTGTTCGAGG            | 260 |
| GbSSR08229 | TTCTGCGACGGATGTAAGTG    | CCCCCTTCCCATCAAGTATT            | 195 |
| GbSSR08593 | TTCCACACAGCACCAACAT     | AGATTTGCACCAGACTTGGG            | 238 |
| GbSSR08802 | TGCAGAAGATGGAAAAAGGG    | GTACGGCTGGTAACTTGGGA            | 191 |
| GbSSR10121 | TGAAAACAGGGCAGATGTTG    | TGGTCTTACCGCATACAGCA            | 127 |
| GbSSR10212 | TTGTGATCCACAGGGTTTCA    | AACGCCTGCATATAGATGGG            | 279 |
| GbSSR11194 | TCATCATCTCCTCCTCCACC    | GGTGGCTGTAGATGGGGTA             | 254 |
| GbSSR11343 | TGTGCGAATTAAATATCTCTCTG | TTGGTCTGTAAACGAAGGTTGA          | 279 |
| GbSSR11395 | CAGCCAGAATCCTTTCCTTG    | CAGGACAGAAGATAAGGCCG            | 207 |

---

|            |                         |                         |     |
|------------|-------------------------|-------------------------|-----|
| GbSSR12018 | TTTGGAGCCATAGGAGATGG    | ACCCACTTAGGGCCAAGTTC    | 194 |
| GbSSR12413 | TTGGTTTGTGTTGCTGCAGAG   | TACAGAAACCAATGCGTCCA    | 191 |
| GbSSR13780 | TGGAGTGATGGAGATGACTAATG | TTGTTTCAAAACACTGCTCAAGA | 185 |
| GbSSR14213 | TTTCATTGCTAGGAAGATGGC   | AGGACGGAAAAATGACCATGA   | 200 |
| GbSSR16688 | AGCTGCTGCTTCTGGTTGTT    | GATGATGGAGACTCCCCTGA    | 269 |
| GbSSR17727 | TGGGCAAAAGTAGCAGAATC    | TCCATGCACATTCCACAGTT    | 112 |
| GbSSR19020 | GAGGATTGCAGATGACCGAT    | ATTGACGGACGCTAATACGC    | 280 |
| GbSSR22336 | ATGGCATTGTCCCATGTTTT    | ACAAGAGCCACGCTGATTTT    | 280 |
| GbSSR26582 | TGCTTCCTCTGCACAGCTTA    | TCAACCATGGAAGACGATGA    | 270 |
| GbSSR26752 | TCTCATGGCTTATCTTGCCA    | CAAAAGAGGAGGGAAAGCCT    | 192 |
| GbSSR27021 | TTTTGGAGATGGAGGTGGAG    | CTGAGGTGGTGCACAGAAGA    | 259 |
| GbSSR28725 | GGTTCATCAATGCTTAGCACA   | AATGCCAAAGGCAAAGATGT    | 256 |
| GbSSR29006 | TATGCCTTGGCTGTCCCTAC    | AACTCTTGGGATCCTTCCGT    | 269 |
| GbSSR31518 | CCCAGAAGATTTTGCACGTT    | CGGATGCATCAAAGAGAACA    | 169 |
| GbSSR31867 | TTTGTAATCCAGGGAACGG     | AATGGACAATACCTCCAGCG    | 273 |
| GbSSR33035 | ACCTGCATGTCTTGTCTCCC    | AGCCACCTTGATGGTTCTTG    | 187 |

---

---

**Table S3.** Analysis of molecular variance of Ginkgo populations.

| <b>Source of variation</b> | <b>df</b> | <b>Sum of squares</b> | <b>Variance components</b> | <b>Mean square deviation</b> | <b>Percentage of variation</b> |
|----------------------------|-----------|-----------------------|----------------------------|------------------------------|--------------------------------|
| Among populations          | 9         | 106.348               | 0.391                      | 11.816                       | 4%                             |
| Within populations         | 91        | 767.573               | 8.435                      | 8.435                        | 96%                            |
| Total                      | 100       | 873.921               | 8.826                      |                              | 100%                           |

---

**Table S4-1.** Ginkgo core collection constructed based on simple proportional sampling.

| Entire<br>samples<br>ratio | Code | Site priority clustering method                                                                                                             | Code | Random clustering sampling<br>method                                                                                                     |
|----------------------------|------|---------------------------------------------------------------------------------------------------------------------------------------------|------|------------------------------------------------------------------------------------------------------------------------------------------|
| 5%                         | C1   | 22、30、81、92                                                                                                                                 | C9   | 31、52、79、100                                                                                                                             |
| 10%                        | C2   | 5、13、22、30、37、48、<br>79、81、92                                                                                                               | C10  | 2、12、28、31、37、52、79、<br>80、100                                                                                                           |
| 15%                        | C3   | 5、13、17、22、30、31、<br>37、41、48、79、81、80、<br>85、92、95                                                                                         | C11  | 2、12、17、27、28、31、37、<br>46、52、79、80、81、87、91、<br>100                                                                                     |
| 20%                        | C4   | 5、8、13、17、22、30、31、<br>37、41、48、50、53、61、<br>79、81、80、68、85、82、<br>92、95                                                                    | C12  | 2、7、12、17、27、28、29、<br>31、37、46、52、55、60、78、<br>79、80、81、87、84、91、100                                                                    |
| 25%                        | C5   | 5、8、13、17、22、30、31、<br>37、41、46、48、50、53、<br>56、61、79、81、80、68、<br>66、85、82、90、92、95、98                                                     | C13  | 2、7、12、17、27、28、29、<br>31、34、37、46、52、55、57、<br>60、68、78、79、80、81、87、<br>84、89、91、95、100                                                 |
| 30%                        | C6   | 5、4、8、13、17、22、30、<br>31、33、37、41、46、48、<br>49、50、53、56、61、79、<br>81、80、68、66、62、85、<br>82、90、92、95、98                                      | C14  | 2、3、7、12、17、27、28、<br>29、31、34、37、39、46、52、<br>55、56、57、60、68、76、78、<br>79、80、81、87、84、89、91、<br>95、100                                  |
| 35%                        | C7   | 5、4、7、8、13、17、22、<br>28、30、31、33、37、39、<br>41、46、48、49、50、53、<br>56、61、79、81、80、68、<br>66、62、64、85、82、90、<br>92、95、98、94                    | C15  | 2、3、7、9、12、17、27、28、<br>29、31、34、37、39、45、46、<br>49、52、55、56、57、60、65、<br>68、76、78、79、80、81、87、<br>84、89、91、95、99、100                    |
| 40%                        | C8   | 5、4、7、8、13、16、17、<br>22、27、28、30、31、33、<br>37、39、41、42、46、48、<br>49、50、53、56、61、79、<br>81、80、68、66、62、64、<br>77、85、87、82、90、92、<br>95、98、94 | C16  | 2、3、7、9、12、15、17、27、<br>28、29、31、34、35、37、39、<br>40、45、46、49、52、55、56、<br>57、60、64、65、68、76、78、<br>79、80、81、86、87、84、89、<br>91、95、99、100 |

**Table S4-2.** Ginkgo core collection constructed based on square root proportion.

| Entire<br>samples<br>ratio | Code | Site priority clustering method                                                                                                         | Code | Random clustering sampling<br>method                                                                                                 |
|----------------------------|------|-----------------------------------------------------------------------------------------------------------------------------------------|------|--------------------------------------------------------------------------------------------------------------------------------------|
| 5%                         | C17  | 13、22、81、92                                                                                                                             | C25  | 12、31、79、100                                                                                                                         |
| 10%                        | C18  | 5、13、17、22、30、61、<br>79、81、82、85、90、92                                                                                                  | C26  | 2、12、17、31、52、60、79、<br>80、84、87、89、100                                                                                              |
| 15%                        | C19  | 5、8、13、17、22、30、48、<br>61、79、81、82、85、90、<br>92、95                                                                                      | C27  | 2、7、12、17、31、37、52、<br>60、79、81、84、87、89、91、<br>100                                                                                  |
| 20%                        | C20  | 5、4、8、13、17、22、30、<br>31、37、48、61、79、81、<br>80、82、85、90、92、95                                                                           | C28  | 2、3、7、12、17、27、28、<br>31、37、52、60、79、80、81、<br>84、87、89、91、100                                                                       |
| 25%                        | C21  | 5、4、7、8、13、16、17、<br>22、30、31、37、41、48、<br>60、61、79、81、80、68、<br>82、84、85、87、90、92、<br>95、98                                            | C29  | 2、3、7、9、12、15、17、27、<br>28、31、37、46、52、60、61、<br>78、79、80、81、83、84、86、<br>87、89、91、95、100                                            |
| 30%                        | C22  | 5、4、7、8、13、16、17、<br>22、30、31、37、41、48、<br>53、60、61、79、81、80、<br>68、66、82、84、85、87、<br>89、90、92、95、98、94                                | C30  | 2、3、7、9、12、15、17、27、<br>28、31、37、46、52、55、60、<br>61、68、78、79、80、81、83、<br>84、86、87、89、90、91、95、<br>99、100                            |
| 35%                        | C23  | 5、4、3、7、8、12、13、<br>15、16、17、22、30、31、<br>37、41、48、50、53、60、<br>61、79、81、80、68、66、<br>62、82、84、85、87、88、<br>89、90、92、95、98、94           | C31  | 2、3、4、7、9、12、13、15、<br>16、17、27、28、29、31、37、<br>46、52、55、60、61、68、76、<br>78、79、80、81、83、84、85、<br>86、87、89、90、91、95、99、<br>100       |
| 40%                        | C24  | 5、4、3、7、8、12、13、<br>15、16、17、22、30、31、<br>37、41、48、50、53、56、<br>60、61、79、81、80、68、<br>66、62、82、84、85、87、<br>88、89、90、92、95、98、<br>94、97 | C32  | 2、3、4、7、9、12、13、15、<br>16、17、27、28、29、31、34、<br>37、46、52、55、60、61、68、<br>76、78、79、80、81、83、84、<br>85、86、87、89、90、91、95、<br>98、99、100 |



**Table S4-3.** Ginkgo core collection constructed on logarithmic proportion.

| Entire<br>samples<br>ratio | Code | Site priority clustering method                                                                                                              | Code | Random clustering sampling<br>method                                                                                                     |
|----------------------------|------|----------------------------------------------------------------------------------------------------------------------------------------------|------|------------------------------------------------------------------------------------------------------------------------------------------|
| 5%                         | C33  | 13、22、81、92                                                                                                                                  | C41  | 12、31、79、100                                                                                                                             |
| 10%                        | C34  | 5、13、17、22、30、61、<br>79、81、82、85、92                                                                                                          | C42  | 2、12、17、31、52、60、79、<br>80、84、87、100                                                                                                     |
| 15%                        | C35  | 5、8、13、17、22、30、48、<br>61、79、81、82、85、90、<br>92、95                                                                                           | C43  | 2、7、12、17、31、37、52、<br>60、79、80、84、87、89、91、<br>100                                                                                      |
| 20%                        | C36  | 4、5、8、13、16、17、22、<br>30、37、48、61、79、81、<br>80、82、85、87、90、92、<br>95、98                                                                      | C44  | 2、3、7、12、15、17、28、<br>31、37、52、60、79、80、81、<br>83、86、87、89、91、95、100                                                                     |
| 25%                        | C37  | 4、5、7、8、13、16、17、<br>22、30、31、37、48、60、<br>61、79、81、80、68、82、<br>84、85、87、90、92、95、98                                                        | C45  | 2、3、7、9、12、15、17、27、<br>28、31、37、52、60、61、78、<br>79、80、81、83、84、86、87、<br>89、91、95、100                                                   |
| 30%                        | C38  | 3、4、5、7、8、13、16、<br>17、22、30、31、37、41、<br>48、60、61、79、81、80、<br>68、66、82、84、85、87、<br>90、92、95、98、94                                         | C46  | 2、3、4、7、9、12、15、17、<br>27、28、31、37、46、52、60、<br>61、68、78、79、80、81、83、<br>84、86、87、89、91、95、99、<br>100                                    |
| 35%                        | C39  | 3、4、5、7、8、12、13、<br>15、16、17、22、30、31、<br>37、41、48、53、60、61、<br>79、81、80、68、66、62、<br>82、84、85、87、88、90、<br>92、95、98、94、97                   | C47  | 2、3、4、7、9、12、13、15、<br>16、17、27、28、31、37、46、<br>52、55、60、61、68、76、78、<br>79、80、81、83、84、85、86、<br>87、89、91、95、98、99、100                  |
| 40%                        | C40  | 2、3、4、5、7、8、10、12、<br>13、15、16、17、22、30、<br>31、37、41、48、50、53、<br>60、61、79、81、80、68、<br>66、62、64、82、84、85、<br>87、88、89、90、92、95、<br>98、94、97 | C48  | 2、3、4、5、7、8、9、12、<br>13、15、16、17、27、28、29、<br>31、37、46、52、55、60、61、<br>65、68、76、78、79、80、81、<br>83、84、85、86、87、89、90、<br>91、95、98、99、100 |

**Table S4-4.** Ginkgo core collection constructed by genetic diversity proportion.

| Entire<br>samples<br>ratio | Code | Site priority clustering<br>method                                                                                        | Code | Random clustering sampling<br>method                                                                                       |
|----------------------------|------|---------------------------------------------------------------------------------------------------------------------------|------|----------------------------------------------------------------------------------------------------------------------------|
| 5%                         | C49  | 5、13、17、22、81、82、85                                                                                                       | C57  | 2、12、17、31、79、84、87                                                                                                        |
| 10%                        | C50  | 5、13、17、22、61、81、<br>82、85、90、92                                                                                          | C58  | 2、12、17、31、60、79、84、<br>87、89、100                                                                                          |
| 15%                        | C51  | 5、4、8、13、16、17、22、<br>30、61、79、81、82、84、<br>85、87、90、92                                                                   | C59  | 2、3、7、12、15、17、31、<br>52、60、79、80、83、84、<br>86、87、89、100                                                                   |
| 20%                        | C52  | 5、4、8、13、16、17、22、<br>30、60、61、79、81、82、<br>84、85、87、89、90、92、<br>95                                                      | C60  | 2、3、7、12、15、17、31、<br>52、60、61、79、80、83、<br>84、86、87、89、90、91、100                                                          |
| 25%                        | C53  | 5、4、3、7、8、13、15、<br>16、17、22、30、48、60、<br>61、79、81、80、82、83、<br>84、85、87、88、89、90、<br>92、95                               | C61  | 2、3、4、7、9、12、15、16、<br>17、31、37、52、60、61、<br>79、80、81、82、83、84、<br>85、86、87、89、90、91、100                                   |
| 30%                        | C54  | 5、4、3、7、8、13、15、<br>16、17、22、30、48、59、<br>60、61、79、81、80、82、<br>83、84、85、87、88、89、<br>90、92、95、98                         | C62  | 2、3、4、7、9、12、15、16、<br>17、31、37、52、59、60、<br>61、79、80、82、82、83、<br>84、85、86、87、89、90、<br>91、95、100                         |
| 35%                        | C55  | 5、4、3、2、7、8、12、<br>13、14、15、16、17、22、<br>30、37、48、59、60、61、<br>79、81、80、68、82、83、<br>84、85、86、87、88、89、<br>90、92、95、98    | C63  | 2、3、4、5、7、9、12、13、<br>14、15、16、17、28、31、<br>37、52、59、60、61、78、<br>79、80、81、82、83、84、<br>85、86、87、88、89、90、<br>91、95、100    |
| 40%                        | C56  | 5、4、3、2、7、8、12、<br>13、14、15、16、17、22、<br>30、37、48、59、60、61、<br>79、81、80、68、82、83、<br>84、85、86、87、88、89、<br>90、92、95、98、94 | C64  | 2、3、4、5、7、9、12、13、<br>14、15、16、17、28、31、<br>37、52、59、60、61、78、<br>79、80、81、82、83、84、<br>85、86、87、88、89、90、<br>91、95、99、100 |

**Table S4-5.** Ginkgo core collection constructed by random non-grouping method.

| Entire<br>samples ratio | Code | Random clustering sampling method                                                                                                                              |
|-------------------------|------|----------------------------------------------------------------------------------------------------------------------------------------------------------------|
| 5%                      | C65  | 34、41、80、99、101                                                                                                                                                |
| 10%                     | C66  | 2、17、34、41、61、75、80、85、99、101                                                                                                                                  |
| 15%                     | C67  | 1、2、3、17、28、30、34、41、61、75、80、83、85、99、101                                                                                                                     |
| 20%                     | C68  | 1、2、3、17、28、30、34、41、46、61、75、80、81、83、85、<br>88、92、96、99、101                                                                                                  |
| 25%                     | C69  | 1、2、3、8、15、17、28、30、34、36、41、46、61、75、80、<br>81、83、85、88、89、92、96、98、99、101                                                                                    |
| 30%                     | C70  | 1、2、3、7、8、14、15、17、28、30、34、36、41、46、51、<br>61、72、75、77、80、81、83、85、88、89、92、96、98、99、<br>101                                                                  |
| 35%                     | C71  | 1、2、3、4、7、8、14、15、17、27、28、30、34、35、36、<br>41、42、46、51、61、72、75、76、77、80、81、83、85、88、<br>89、92、96、98、99、101                                                    |
| 40%                     | C72  | 1、2、3、4、7、8、9、11、14、15、17、27、28、30、34、35、<br>36、41、42、44、46、51、57、61、72、75、76、77、80、42、<br>44、46、51、57、61、72、75、76、77、80、81、82、83、85、<br>88、89、92、96、98、99、101 |

**Table S5.** Tests for core collection of Ginkgo.

| Entire samples<br>ratio            | Entire<br>samples<br>ratio | Code | Site priority<br>clustering method |         | Code | Random clustering<br>sampling<br>method |         |
|------------------------------------|----------------------------|------|------------------------------------|---------|------|-----------------------------------------|---------|
|                                    |                            |      | I                                  | H       |      | I                                       | H       |
|                                    |                            |      | p value                            | p value |      | p value                                 | p value |
| Simple<br>proportion               | 5%                         | C1   | 0.101                              | 0.164   | C33  | 0.076                                   | 0.094   |
|                                    | 10%                        | C2   | 0.674                              | 0.892   | C34  | 0.981                                   | 0.946   |
|                                    | 15%                        | C3   | 0.953                              | 0.858   | C35  | 0.906                                   | 0.926   |
|                                    | 20%                        | C4   | 0.978                              | 0.934   | C36  | 0.954                                   | 0.861   |
|                                    | 25%                        | C5   | 0.884                              | 0.839   | C37  | 0.954                                   | 0.915   |
|                                    | 30%                        | C6   | 0.935                              | 0.915   | C38  | 0.928                                   | 0.828   |
|                                    | 35%                        | C7   | 0.933                              | 0.996   | C39  | 0.913                                   | 0.851   |
|                                    | 40%                        | C8   | 0.931                              | 0.996   | C40  | 0.885                                   | 0.887   |
| Square root ratio                  | 5%                         | C9   | 0.041*                             | 0.093   | C41  | 0.492                                   | 0.935   |
|                                    | 10%                        | C10  | 0.923                              | 0.948   | C42  | 0.865                                   | 0.900   |
|                                    | 15%                        | C11  | 0.886                              | 0.678   | C43  | 0.870                                   | 0.966   |
|                                    | 20%                        | C12  | 0.871                              | 0.726   | C44  | 0.882                                   | 0.723   |
|                                    | 25%                        | C13  | 0.887                              | 0.797   | C45  | 0.762                                   | 0.614   |
|                                    | 30%                        | C14  | 0.949                              | 0.877   | C46  | 0.782                                   | 0.670   |
|                                    | 35%                        | C15  | 0.843                              | 0.734   | C47  | 0.717                                   | 0.585   |
|                                    | 40%                        | C16  | 0.851                              | 0.731   | C48  | 0.714                                   | 0.574   |
| Ratio of<br>logarithms             | 5%                         | C17  | 0.041*                             | 0.510   | C49  | 0.492                                   | 0.511   |
|                                    | 10%                        | C18  | 0.800                              | 0.560   | C50  | 0.809                                   | 0.510   |
|                                    | 15%                        | C19  | 0.900                              | 0.575   | C51  | 0.912                                   | 0.516   |
|                                    | 20%                        | C20  | 0.853                              | 0.574   | C52  | 0.759                                   | 0.531   |
|                                    | 25%                        | C21  | 0.926                              | 0.571   | C53  | 0.764                                   | 0.530   |
|                                    | 30%                        | C22  | 0.913                              | 0.569   | C54  | 0.794                                   | 0.525   |
|                                    | 35%                        | C23  | 0.858                              | 0.573   | C55  | 0.742                                   | 0.530   |
|                                    | 40%                        | C24  | 0.831                              | 0.575   | C56  | 0.753                                   | 0.529   |
| Proportion of<br>genetic diversity | 5%                         | C25  | 0.513                              | 0.711   | C57  | 0.656                                   | 0.995   |
|                                    | 10%                        | C26  | 0.734                              | 0.866   | C58  | 0.972                                   | 0.601   |
|                                    | 15%                        | C27  | 0.946                              | 0.814   | C59  | 0.905                                   | 0.647   |
|                                    | 20%                        | C28  | 0.915                              | 0.684   | C60  | 0.857                                   | 0.648   |
|                                    | 25%                        | C29  | 0.793                              | 0.601   | C61  | 0.806                                   | 0.587   |
|                                    | 30%                        | C30  | 0.854                              | 0.673   | C62  | 0.812                                   | 0.597   |
|                                    | 35%                        | C31  | 0.837                              | 0.684   | C63  | 0.719                                   | 0.549   |
|                                    | 40%                        | C32  | 0.878                              | 0.765   | C64  | 0.712                                   | 0.553   |
| Random<br>ungrouped                | 5%                         |      |                                    |         | C65  | 0.468                                   | 0.814   |
|                                    | 10%                        |      |                                    |         | C66  | 0.790                                   | 0.769   |
|                                    | 15%                        |      |                                    |         | C67  | 0.662                                   | 0.585   |
|                                    | 20%                        |      |                                    |         | C68  | 0.780                                   | 0.834   |
|                                    | 25%                        |      |                                    |         | C69  | 0.769                                   | 0.727   |

---

|     |     |       |       |
|-----|-----|-------|-------|
| 30% | C70 | 0.815 | 0.769 |
| 35% | C71 | 0.878 | 0.878 |
| 40% | C72 | 0.889 | 0.878 |

---

Note: \*:  $P < 0.05$ , means significant difference.

**Table S6.** Comparison of different sampling strategies.

| Entire<br>samples ratio            | Locus priority clustering method         |                                              | Random cluster sampling method              |                                              |
|------------------------------------|------------------------------------------|----------------------------------------------|---------------------------------------------|----------------------------------------------|
|                                    | Mean Shannon's<br>diversity index<br>(I) | Mean Nei's<br>genetic diversity<br>index (H) | Mean<br>Shannon's<br>diversity index<br>(I) | Mean Nei's<br>genetic diversity<br>index (H) |
| Simple<br>proportion               | 0.975                                    | 0.559                                        | 0.927                                       | 0.508                                        |
| Square root<br>ratio               | 0.980                                    | 0.564                                        | 0.949                                       | 0.573                                        |
| Ratio of<br>logarithms             | 0.979                                    | 0.563                                        | 0.950                                       | 0.523                                        |
| Proportion of<br>genetic diversity | 0.994                                    | 0.570                                        | 0.956                                       | 0.528                                        |
| Random<br>ungrouped                |                                          |                                              | 0.927                                       | 0.490                                        |

---

**Table S7.** Comparison of different sampling ratio in group.

| Overall<br>sampling<br>ratio | Locus priority clustering method         |                                              | Random cluster sampling method           |                                              |
|------------------------------|------------------------------------------|----------------------------------------------|------------------------------------------|----------------------------------------------|
|                              | Mean Shannon's<br>diversity index<br>(I) | Mean Nei's<br>genetic diversity<br>index (H) | Mean Shannon's<br>diversity index<br>(I) | Mean Nei's<br>genetic diversity<br>index (H) |
| 5%                           | 0.849                                    | 0.521                                        | 0.854                                    | 0.506                                        |
| 10%                          | 0.967                                    | 0.560                                        | 0.933                                    | 0.531                                        |
| 15%                          | 1.003                                    | 0.573                                        | 0.943                                    | 0.531                                        |
| 20%                          | 1.005                                    | 0.573                                        | 0.960                                    | 0.538                                        |
| 25%                          | 1.009                                    | 0.573                                        | 0.965                                    | 0.539                                        |
| 30%                          | 1.004                                    | 0.570                                        | 0.965                                    | 0.538                                        |
| 35%                          | 1.010                                    | 0.572                                        | 0.972                                    | 0.540                                        |
| 40%                          | 1.009                                    | 0.571                                        | 0.973                                    | 0.540                                        |

---

**Table S8.** Ginkgo core collection.

| Code | Name             | Origin  | Code | Name                | Origin   | Code | Name             | Origin   |
|------|------------------|---------|------|---------------------|----------|------|------------------|----------|
| 3    | Guilin 8         | Guangxi | 22   | Caiye yinxing       | Jiangsu  | 83   | Gangxi 2         | Shaanxi  |
| 4    | Guilin 9         | Guangxi | 30   | Tiema 1             | Jiangsu  | 84   | Yanan 1          | Shaanxi  |
| 5    | Haiyang<br>huang | Guangxi | 48   | Huaye yinxing       | Jiangsu  | 85   | Changing 1       | Zhejiang |
| 7    | Daozhen<br>7     | Guizhou | 60   | Dongbei dahushanxia | Liaoning | 87   | Changing 3       | Zhejiang |
| 8    | Changbai<br>guo  | Guizhou | 61   | Dongbei dazhaizi    | Liaoning | 88   | Changing 4       | Zhejiang |
| 13   | Zhengan<br>4     | Guizhou | 79   | Xincun 9            | Shandong | 89   | Tengjiulang      | JPN      |
| 15   | Anlu 1-5         | Hubei   | 80   | Tancheng<br>207     | Shandong | 90   | Jiushou          | JPN      |
| 16   | Anlu 1-6         | Hubei   | 81   | Yezi yinxing        | Shandong | 92   | Zhongnanlin<br>2 | Hunan    |
| 17   | Pengrisan<br>1-6 | Hubei   | 82   | Gangxi 1            | Shaanxi  | 95   | Shao 1-10        | Hunan    |



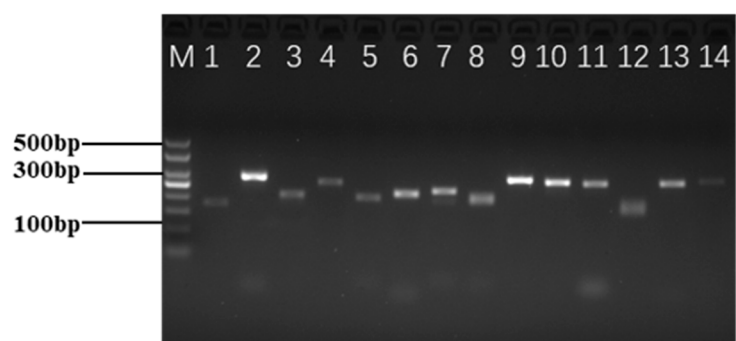

**Figure S1.** PCR electrophoresis diagram of Partial primers of SSRs.

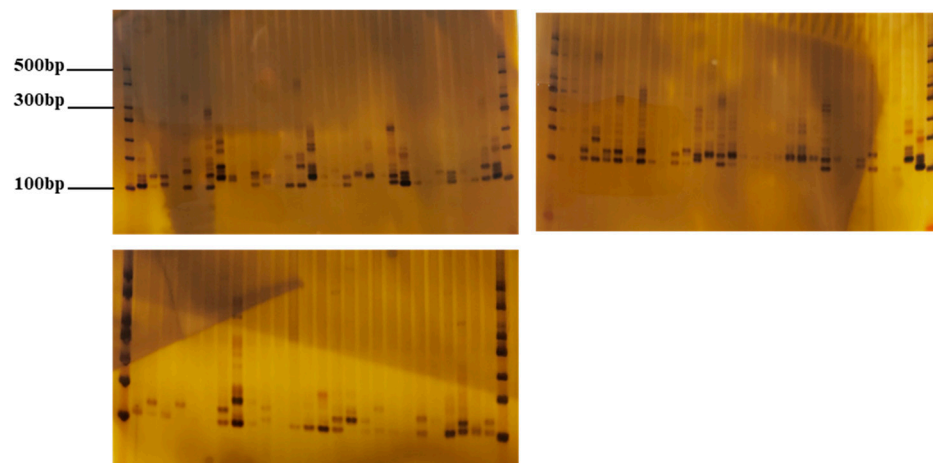

**Figure S2.** Polymorphism map of GbSSR01538 in 101 Ginkgo germplasm resources.

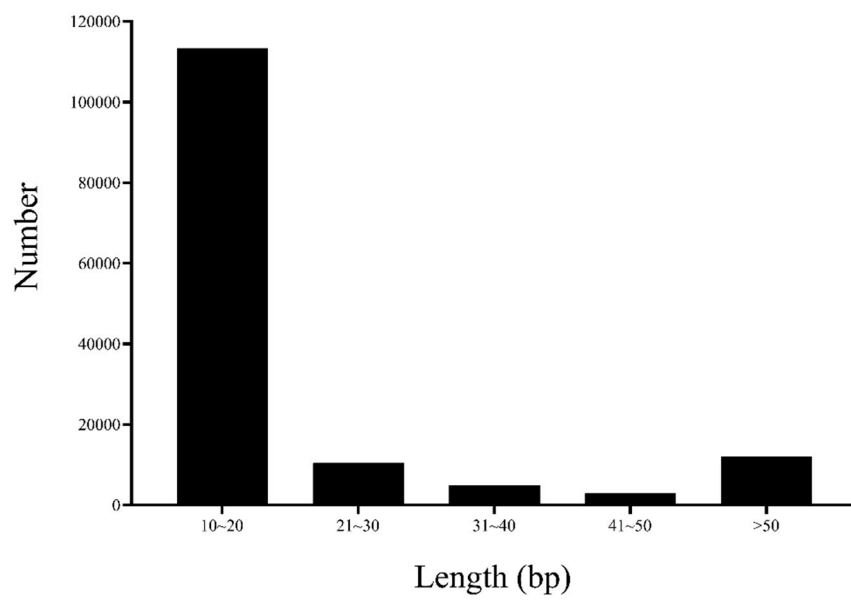

**Figure S3.** Length distribution of SSR in Ginkgo transcriptome.

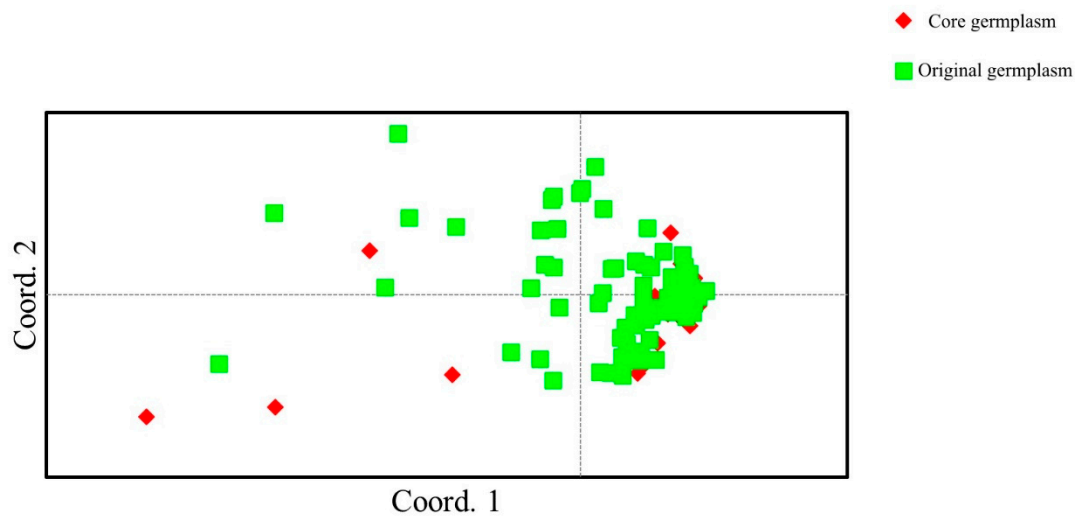

**Figure S4.** Principal component analysis of the core collection and the initial collection of Ginkgo.
